# Supplementary material for: Efficiency and safety of modified Bricker surgery for pelvic lipomatosis: a prospective, multicenter, longitudinal study
Source: Research Square preprint supplement (doi:10.21203/rs.3.rs-1721966/v1), 2022-06-07
Supplement: Supplementary file 1 [file 217a850f70d95aee8d4f23e3.xlsx]

## Sheet: Sheet1
Table 1 Demographics data of PL patients
Case	Gender	Age	Height（cm）	Weight（kg）	BMI	First symptoms	Examination	Laboratory test	Surgical approach	Nephrostomy before operation	Intraoperative complications
1	Male	35	180	70	21.6	Dysuria	MRI、CT、Ultrasound	Renal function test、Blood routine test	Open surgery	No	No
2	Male	30	160	65	25.4	Bilateral flank pain	MRI、Ultrasound	Renal function test	Open surgery	Yes	No
3	Male	53	170	100	34.6	Bladder irritation	MRI、CT、Ultrasound、Renal dynamic imaging	Renal function test、Urine routine test、Urine culture test	Open surgery	Yes	No
4	Male	33	173	70	23.4	Hypertension	MRI、CT、Ultrasound、Renal dynamic imaging、Urodynamics	Renal function test、Urine routine test	Open surgery	No	No
5	Male	43	170	75	26	Lower abdominal pain	CT、Ultrasound	Renal function test、Blood routine test、Urine routine test	Open surgery	Yes	No
6	Male	45	160	62	24.2	Imaging examination	MRI、CT、Ultrasound、Renal dynamic imaging、Cystoscopy	Renal function test、Blood routine test、Urine routine test	Open surgery	No	No
7	Male	49	180	90	27.8	Bladder irritation	CT、X-ray、Ultrasound	Renal function test	Open surgery	No	No
PL, pelvic lipomatosis; BMI, body mass index.
