# Supplementary material for: Efficiency and safety of modified Bricker surgery for pelvic lipomatosis: a prospective, multicenter, longitudinal study
Source: Research Square preprint supplement (doi:10.21203/rs.3.rs-1721966/v1), 2022-06-07
Supplement: Supplementary file 2 [file 2bc737d502c214c733defed9.xlsx]

## Sheet: Sheet1
Table 2 Perioperative and follow-up data of PL patients
Case	Preoperative				Intraoperative			Postoperative		Follow-up
	Creatinine（umol/L）	Hydronephrosis (Left)	Hydronephrosis (Right)		Operation time（min）	Bleeding volume（ml）		Postoperative hospital days		Creatinine（umol/L）	Hydronephrosis (Left)	Hydronephrosis (Right)	Follow-up time
1	210	8.1	7.4		240	200		9		178	2.8	2.3	13 months after operation
2	294	1.4	2.5		190	100		11		159	0.7	0.6	13 months after operation
3	118	3.6	2.1		285	600		15		88	1.6	1.7	14 months after operation
4	174	3.6	7.6		180	100		13		122	1.6	1.7	7 months after operation
5	129	1.7	0		287	150		14		109	0.7	0	7 months after operation
6	193	2	2.3		295	100		9		132	1.8	1	6 months after operation
7	110	2.9	2.9		335	200		9		106	1	1.7	6 months after operation
PL, pelvic lipomatosis.
